# Supplementary material for: Reversion of Gut Microbiota during the Recovery Phase in Patients with Asymptomatic or Mild COVID-19: Longitudinal Study
Source: MDPI journal article supplement (doi:10.3390/microorganisms9061237), 2021-06-07
Supplement: s1 [file s1]

## **Supplemental Files**

### **Reversion of gut microbiota during the recovery phase in patients with asymptomatic or mild COVID-19: a longitudinal study**

Han-Na Kim, Eun-Jeong Joo, Chil-Woo Lee, Kwangsung Ahn, Hyung-Lae Kim, Dong-Il Park\*, and Soo-Kyung Park\*

Supplementary Fig. S1. Rarefaction curve based on alpha diversity metrics.

Supplementary Fig. S2. Individual-based alpha diversity variation of gut microbiota in patients with COVID-19.

Supplementary Table S1. Comparison of taxonomic compositions of gut microbiota from the phylum to genus level between respiratory positive (RP)-SARS-COV-2 and respiratory negative (RN)-SARS-COV-2 states

Supplementary Table S2. Taxonomic compositions of gut microbiota in the respiratory positive (RP)-SARS-COV-2 and respiratory negative (RN)-SARS-COV-2 compared with those in healthy controls, respectively.

\* Corresponding authors contact details:

Soo-Kyung Park, Sungkyunkwan University School of Medicine, Seoul, Republic of Korea:  
skparkmd@gmail.com

Dong Il Park, Sungkyunkwan University School of Medicine, Seoul, Republic of Korea:  
diksmc.park@samsung.com

**Supplementary Fig. S1. Rarefaction curve based on alpha diversity metrics.**

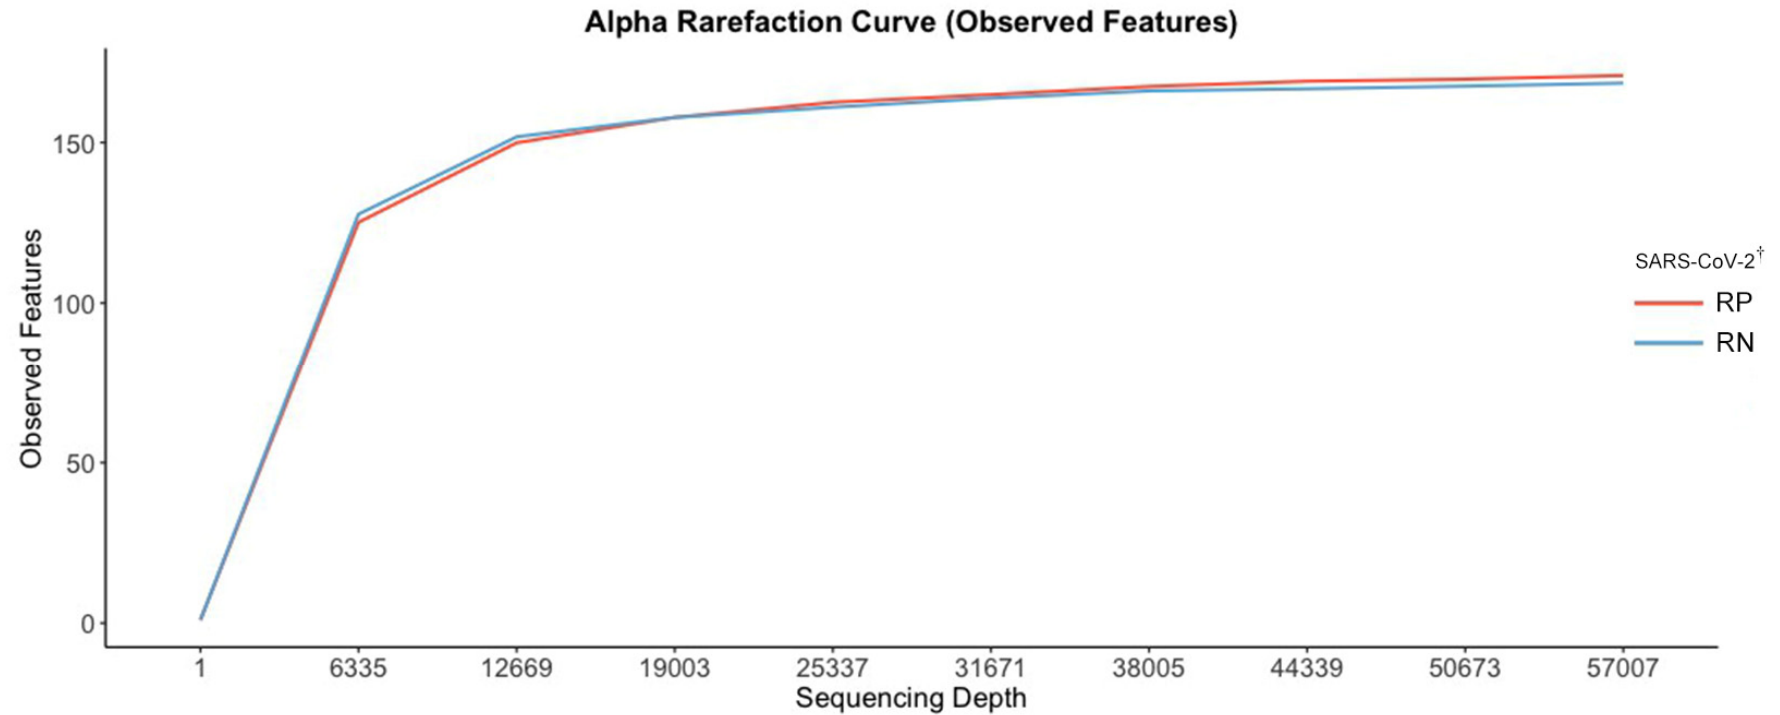

The number of observed ASVs indicated that 57,007 sequences per sample are sufficient for capturing the alpha diversity of microbial communities in both respiratory positive (RP) SARS-CoV-2 and respiratory negative (RN) SARS-CoV-2. The x-axis shows the number of sequences per sample. The rarefaction curves construction (10 replicates/depth) was performed using the "diversity alpha-rarefaction" plugin QIIME2. <sup>†</sup>SARS-CoV-2 RNA from the respiratory tract. RP, respiratory positive SARS-CoV-2; RN, respiratory negative SARS-CoV-2

**Supplementary Fig. S2. Individual-based alpha diversity variation of gut microbiota in patients with COVID-19.**

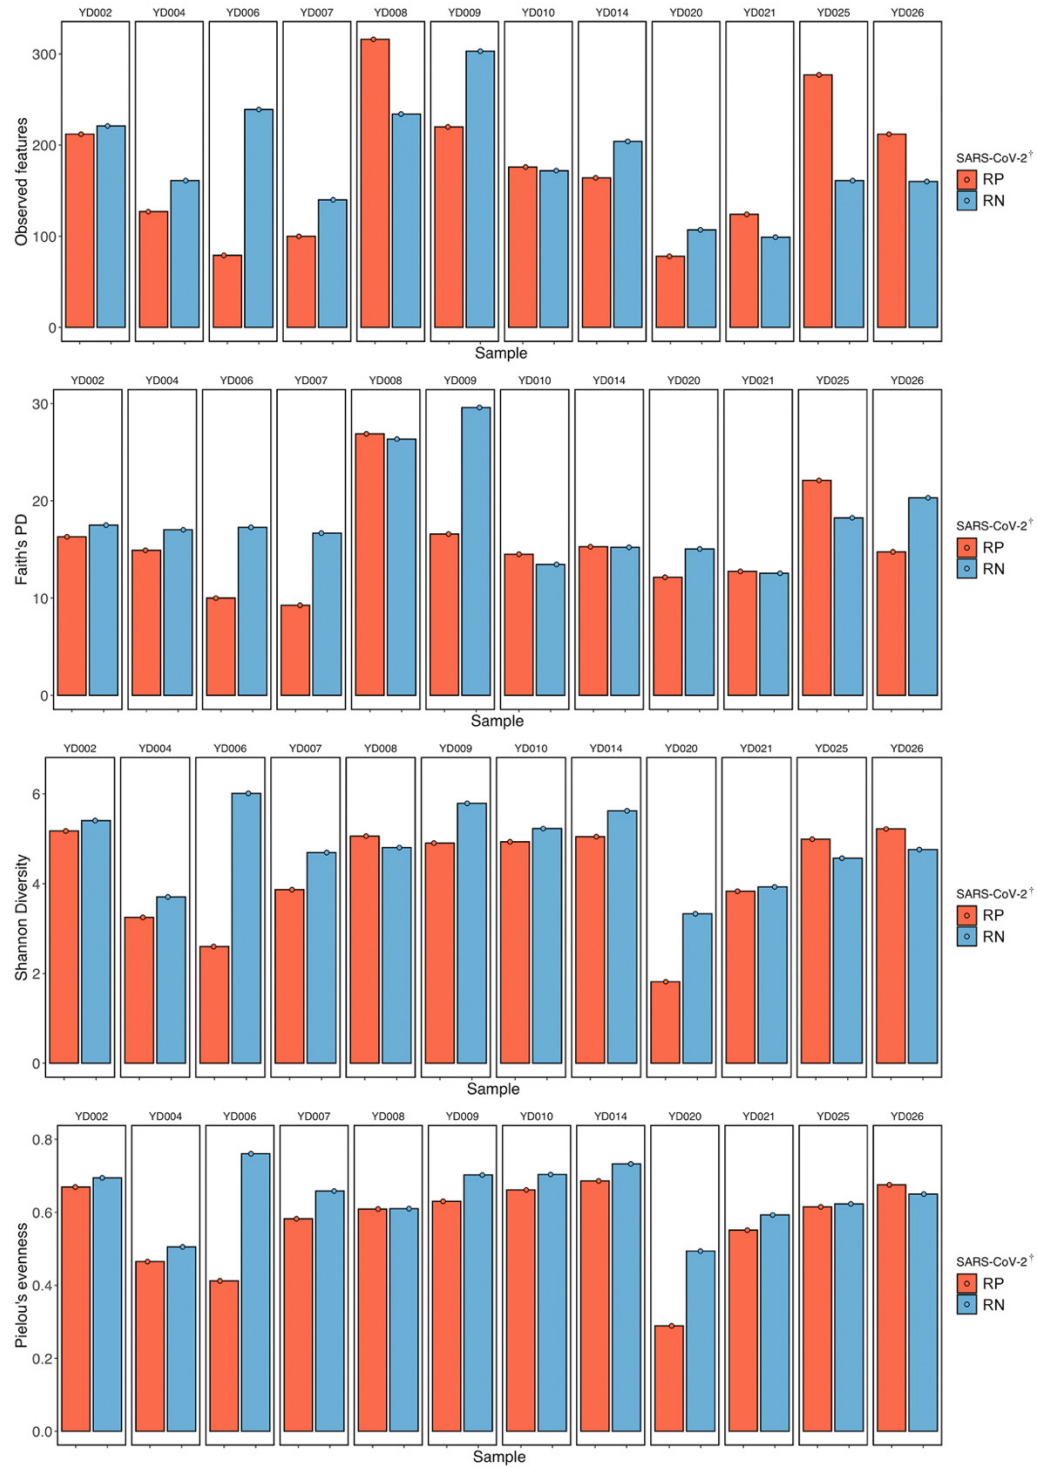

†SARS-CoV-2 RNA from the respiratory tract. RP, respiratory positive SARS-CoV-2; RN, respiratory negative SARS-CoV-2

**Supplementary Table S1. Comparison of taxonomic compositions of gut microbiota from the phylum to genus level between respiratory positive (RP)-SARS-CoV-2 and respiratory negative (RN)-SARS-CoV-2 states**

| Taxonomy level | Feature                                                                                                 | Value <sup>a</sup> | Coef. (SE)   | Exp(Coef.) <sup>b</sup> | <i>p</i> -value | <i>q</i> -value <sup>c</sup> |
|----------------|---------------------------------------------------------------------------------------------------------|--------------------|--------------|-------------------------|-----------------|------------------------------|
| Phylum         | d__Bacteria;p__Bacteroidota                                                                             | RN                 | 1.20 (0.26)  | 3.34                    | 1.3.E-04        | <b>9.2.E-04*</b>             |
| Phylum         | d__Bacteria;p__Actinobacteriota                                                                         | RN                 | -0.58 (0.22) | 0.56                    | 1.5.E-02        | 5.1.E-02                     |
| Order          | d__Bacteria;p__Bacteroidota;c__Bacteroidia                                                              | RN                 | 1.20 (0.26)  | 3.34                    | 1.3.E-04        | <b>1.3.E-03*</b>             |
| Class          | d__Bacteria;p__Bacteroidota;c__Bacteroidia;o__Bacteroidales                                             | RN                 | 1.20 (0.26)  | 3.34                    | 1.3.E-04        | <b>2.9.E-03*</b>             |
| Class          | d__Bacteria;p__Actinobacteriota;c__Actinobacteria;o__Actinomycetales                                    | RN                 | -0.86 (0.24) | 0.42                    | 4.0.E-03        | <b>4.4.E-02*</b>             |
| Family         | d__Bacteria;p__Actinobacteriota;c__Actinobacteria;o__Actinomycetales;f__Actinomycetaceae                | RN                 | -0.86 (0.24) | 0.42                    | 4.0.E-03        | 7.8.E-02                     |
| Family         | d__Bacteria;p__Bacteroidota;c__Bacteroidia;o__Bacteroidales;f__Bacteroidaceae                           | RN                 | 1.14 (0.30)  | 3.12                    | 2.9.E-03        | 7.8.E-02                     |
| Family         | d__Bacteria;p__Bacteroidota;c__Bacteroidia;o__Bacteroidales;f__Marinifilaceae                           | RN                 | 0.94 (0.29)  | 2.57                    | 8.2.E-03        | 8.0.E-02                     |
| Family         | d__Bacteria;p__Bacteroidota;c__Bacteroidia;o__Bacteroidales;f__Tannerellaceae                           | RN                 | 1.30 (0.43)  | 3.65                    | 6.4.E-03        | 8.0.E-02                     |
| Genus          | d__Bacteria;p__Actinobacteriota;c__Actinobacteria;o__Actinomycetales;f__Actinomycetaceae;g__Actinomyces | RN                 | -0.85 (0.24) | 0.43                    | 4.1.E-03        | 9.2.E-02                     |
| Genus          | d__Bacteria;p__Bacteroidota;c__Bacteroidia;o__Bacteroidales;f__Bacteroidaceae;g__Bacteroides            | RN                 | 1.14 (0.30)  | 3.12                    | 2.9.E-03        | 9.2.E-02                     |
| Genus          | d__Bacteria;p__Firmicutes;c__Clostridia;o__Lachnospirales;f__Lachnospiraceae;g__Fusicatenibacter        | RN                 | -0.51 (0.14) | 0.60                    | 4.2.E-03        | 9.2.E-02                     |
| Genus          | d__Bacteria;p__Firmicutes;c__Clostridia;o__Lachnospirales;f__Lachnospiraceae;g__Lachnoclostridium       | RN                 | 1.26 (0.36)  | 3.54                    | 4.6.E-03        | 9.2.E-02                     |

<sup>a</sup> RP SARS-CoV-2 was used as a baseline

<sup>b</sup> The coefficients (Coef.) were exponentiated because the relative abundance of taxa was log-transformed in the mixed model.

<sup>c</sup> *q*-values less than 0.1 are listed. A *q*-value less than 0.05 is boldfaced and marked with an asterisk.

**Supplementary Table S2. Taxonomic compositions of gut microbiota in the respiratory positive (RP)-SARS-CoV-2 and respiratory negative (RN)-SARS-CoV-2 compared with those in healthy controls, respectively.**

| Taxonomy level | Feature <sup>a</sup>                                                                            | Positive <sup>b</sup> |                          |                              | Negative <sup>b</sup> |                          |                              |
|----------------|-------------------------------------------------------------------------------------------------|-----------------------|--------------------------|------------------------------|-----------------------|--------------------------|------------------------------|
|                |                                                                                                 | Coef.                 | Exp (coef.) <sup>c</sup> | <i>q</i> -value <sup>d</sup> | Coef.                 | Exp (coef.) <sup>c</sup> | <i>q</i> -value <sup>d</sup> |
| Phylum         | d__Bacteria;p__Bacteroidota                                                                     | -1.44                 | 0.24                     | 1.24.E-12                    | -0.32                 | 0.72                     | 6.64.E-02                    |
| Class          | d__Bacteria;p__Bacteroidota;c__Bacteroidia                                                      | -1.44                 | 0.24                     | 9.31.E-13                    | -0.32                 | 0.72                     | 5.43.E-02                    |
| Class          | d__Bacteria;p__Firmicutes;c__Negativicutes                                                      | -1.06                 | 0.35                     | 3.27.E-04                    | -0.96                 | 0.38                     | 7.89.E-04                    |
| Order          | d__Bacteria;p__Bacteroidota;c__Bacteroidia;o__Bacteroidales                                     | -1.44                 | 0.24                     | 2.08.E-12                    | -0.32                 | 0.72                     | 7.40.E-02                    |
| Order          | d__Bacteria;p__Firmicutes;c__Clostridia;o__Oscillospirales                                      | -0.76                 | 0.47                     | 5.92.E-06                    | -0.26                 | 0.77                     | 1.36.E-01                    |
| Order          | d__Bacteria;p__Firmicutes;c__Negativicutes;o__Veillonellales;Selenomonadales                    | -1.45                 | 0.23                     | 6.59.E-04                    | -1.20                 | 0.30                     | 4.22.E-03                    |
| Order          | d__Bacteria;p__Firmicutes;c__Clostridia;o__Monoglobales                                         | -1.02                 | 0.36                     | 4.22.E-03                    | -0.78                 | 0.46                     | 3.23.E-02                    |
| Family         | d__Bacteria;p__Firmicutes;c__Clostridia;o__Oscillospirales;f__Oscillospiraceae                  | -1.83                 | 0.16                     | 1.65.E-07                    | -1.14                 | 0.32                     | 3.88.E-04                    |
| Family         | d__Bacteria;p__Bacteroidota;c__Bacteroidia;o__Bacteroidales;f__Bacteroidaceae                   | -1.23                 | 0.29                     | 1.80.E-06                    | -0.14                 | 0.87                     | 5.73.E-01                    |
| Family         | d__Bacteria;p__Firmicutes;c__Clostridia;o__Oscillospirales;f__Ruminococcaceae                   | -0.72                 | 0.49                     | 2.62.E-05                    | -0.16                 | 0.85                     | 3.52.E-01                    |
| Family         | d__Bacteria;p__Bacteroidota;c__Bacteroidia;o__Bacteroidales;f__Tannerellaceae                   | -1.39                 | 0.25                     | 6.11.E-05                    | -0.27                 | 0.76                     | 4.29.E-01                    |
| Family         | d__Bacteria;p__Bacteroidota;c__Bacteroidia;o__Bacteroidales;f__Marinifilaceae                   | -1.40                 | 0.25                     | 7.94.E-05                    | -0.65                 | 0.52                     | 6.52.E-02                    |
| Family         | d__Bacteria;p__Bacteroidota;c__Bacteroidia;o__Bacteroidales;f__Prevotellaceae                   | -1.95                 | 0.14                     | 1.71.E-04                    | -0.97                 | 0.38                     | 6.42.E-02                    |
| Family         | d__Bacteria;p__Bacteroidota;c__Bacteroidia;o__Bacteroidales;f__Rikenellaceae                    | -1.34                 | 0.26                     | 3.12.E-04                    | -0.72                 | 0.49                     | 5.99.E-02                    |
| Family         | d__Bacteria;p__Firmicutes;c__Clostridia;o__Oscillospirales;f__Butyrivibrionaceae                | -0.86                 | 0.42                     | 2.83.E-03                    | -0.48                 | 0.62                     | 1.04.E-01                    |
| Family         | d__Bacteria;p__Firmicutes;c__Clostridia;o__Monoglobales;f__Monoglobaceae                        | -1.02                 | 0.36                     | 3.94.E-03                    | -0.78                 | 0.46                     | 3.10.E-02                    |
| Family         | d__Bacteria;p__Bacteroidota;c__Bacteroidia;o__Bacteroidales;f__Barnesiellaceae                  | -1.33                 | 0.26                     | 1.46.E-02                    | -1.02                 | 0.36                     | 6.17.E-02                    |
| Family         | d__Bacteria;p__Firmicutes;c__Negativicutes;o__Veillonellales;Selenomonadales;f__Veillonellaceae | -1.17                 | 0.31                     | 1.47.E-02                    | -0.76                 | 0.47                     | 1.17.E-01                    |

|        |                                                                                                                               |       |      |           |       |      |           |
|--------|-------------------------------------------------------------------------------------------------------------------------------|-------|------|-----------|-------|------|-----------|
| Family | <a href="#">d__Bacteria;p__Firmicutes;c__Clostridia;o__Oscillospirales;f__Eubacterium_coprostanoligenes_group</a>             | -0.77 | 0.46 | 4.17.E-02 | -0.34 | 0.71 | 3.65.E-01 |
| Genus  | <a href="#">d__Bacteria;p__Bacteroidota;c__Bacteroidia;o__Bacteroidales;f__Bacteroidaceae;g__Bacteroides</a>                  | -1.23 | 0.29 | 4.42.E-06 | -0.27 | 0.76 | 4.35.E-01 |
| Genus  | <a href="#">d__Bacteria;p__Firmicutes;c__Clostridia;o__Oscillospirales;f__Oscillospiraceae;g__UCG 002</a>                     | -1.58 | 0.21 | 4.42.E-06 | -1.39 | 0.25 | 4.28.E-05 |
| Genus  | <a href="#">d__Bacteria;p__Firmicutes;c__Clostridia;o__Oscillospirales;f__Ruminococcaceae;g__Faecalibacterium</a>             | -0.82 | 0.44 | 7.79.E-05 | -0.30 | 0.74 | 1.32.E-01 |
| Genus  | <a href="#">d__Bacteria;p__Bacteroidota;c__Bacteroidia;o__Bacteroidales;f__Tannerellaceae;g__Parabacteroides</a>              | -1.39 | 0.25 | 1.18.E-04 | -0.27 | 0.76 | 4.35.E-01 |
| Genus  | <a href="#">d__Bacteria;p__Firmicutes;c__Clostridia;o__Oscillospirales;f__Oscillospiraceae;g__UCG 003</a>                     | -1.33 | 0.26 | 2.29.E-04 | -1.10 | 0.33 | 2.12.E-03 |
| Genus  | <a href="#">d__Bacteria;p__Firmicutes;c__Clostridia;o__Lachnospirales;f__Lachnospiraceae;g__Lachnospiraceae_NK4A136_group</a> | -1.44 | 0.24 | 3.83.E-04 | -0.86 | 0.42 | 2.99.E-02 |
| Genus  | <a href="#">d__Bacteria;p__Proteobacteria;c__Gammaproteobacteria;o__Burkholderiales;f__Sutterellaceae;g__Sutterella</a>       | -1.67 | 0.19 | 8.07.E-04 | -0.38 | 0.68 | 4.35.E-01 |
| Genus  | <a href="#">d__Bacteria;p__Firmicutes;c__Clostridia;o__Oscillospirales;f__Oscillospiraceae;g__NK4A214_group</a>               | -1.30 | 0.27 | 1.28.E-03 | -1.15 | 0.32 | 4.16.E-03 |
| Genus  | <a href="#">d__Bacteria;p__Bacteroidota;c__Bacteroidia;o__Bacteroidales;f__Rikenellaceae;g__Alistipes</a>                     | -1.26 | 0.28 | 2.00.E-03 | -0.63 | 0.53 | 1.17.E-01 |
| Genus  | <a href="#">d__Bacteria;p__Bacteroidota;c__Bacteroidia;o__Bacteroidales;f__Marinifilaceae;g__Odoribacter</a>                  | -1.03 | 0.36 | 2.10.E-03 | -0.35 | 0.71 | 2.87.E-01 |
| Genus  | <a href="#">d__Bacteria;p__Firmicutes;c__Clostridia;o__Lachnospirales;f__Lachnospiraceae;g__Roseburia</a>                     | -0.85 | 0.43 | 2.99.E-02 | -1.19 | 0.31 | 2.75.E-03 |
| Genus  | <a href="#">d__Bacteria;p__Firmicutes;c__Clostridia;o__Lachnospirales;f__Lachnospiraceae;g__Anaerostipes</a>                  | -0.75 | 0.47 | 8.02.E-03 | -0.82 | 0.44 | 4.16.E-03 |
| Genus  | <a href="#">d__Bacteria;p__Firmicutes;c__Clostridia;o__Oscillospirales;f__Ruminococcaceae;g__Ruminococcus</a>                 | -1.23 | 0.29 | 4.43.E-03 | -0.71 | 0.49 | 9.89.E-02 |
| Genus  | <a href="#">d__Bacteria;p__Firmicutes;c__Clostridia;o__Lachnospirales;f__Lachnospiraceae;g__Lachnoclostridium</a>             | -1.03 | 0.36 | 4.49.E-03 | 0.23  | 1.26 | 5.21.E-01 |
| Genus  | <a href="#">d__Bacteria;p__Firmicutes;c__Clostridia;o__Lachnospirales;f__Lachnospiraceae;g__Agathobacter</a>                  | -1.00 | 0.37 | 5.33.E-03 | -0.50 | 0.60 | 1.44.E-01 |
| Genus  | <a href="#">d__Bacteria;p__Firmicutes;c__Clostridia;o__Lachnospirales;f__Lachnospiraceae;g__Lachnospira</a>                   | -1.20 | 0.30 | 5.39.E-03 | -0.74 | 0.48 | 8.95.E-02 |
| Genus  | <a href="#">d__Bacteria;p__Firmicutes;c__Clostridia;o__Oscillospirales;f__Butyricicoccaceae;g__Butyricicoccus</a>             | -0.81 | 0.45 | 5.70.E-03 | -0.45 | 0.64 | 1.19.E-01 |
| Genus  | <a href="#">d__Bacteria;p__Firmicutes;c__Clostridia;o__Monoglobales;f__Monoglobaceae;g__Monoglobus</a>                        | -1.02 | 0.36 | 5.92.E-03 | -0.78 | 0.46 | 3.43.E-02 |
| Genus  | <a href="#">d__Bacteria;p__Firmicutes;c__Clostridia;o__Lachnospirales;f__Lachnospiraceae;g__Fusicatenibacter</a>              | -0.49 | 0.61 | 1.19.E-01 | -0.86 | 0.42 | 7.24.E-03 |
| Genus  | <a href="#">d__Bacteria;p__Firmicutes;c__Clostridia;o__Oscillospirales;f__Oscillospiraceae;g__Colidextribacter</a>            | -1.02 | 0.36 | 7.24.E-03 | -0.49 | 0.61 | 1.80.E-01 |
| Genus  | <a href="#">d__Bacteria;p__Bacteroidota;c__Bacteroidia;o__Bacteroidales;f__Prevotellaceae;g__Paraprevotella</a>               | -1.19 | 0.31 | 1.02.E-02 | -0.38 | 0.68 | 4.09.E-01 |
| Genus  | <a href="#">d__Bacteria;p__Firmicutes;c__Clostridia;o__Lachnospirales;f__Lachnospiraceae;g__Lachnospiraceae_UCG 010</a>       | -1.04 | 0.35 | 1.06.E-02 | -0.59 | 0.55 | 1.39.E-01 |

|        |                                                                                                                                                  |       |       |           |       |      |           |
|--------|--------------------------------------------------------------------------------------------------------------------------------------------------|-------|-------|-----------|-------|------|-----------|
| Genus  | d__Bacteria;p__Bacteroidota;c__Bacteroidia;o__Bacteroidales;f__Marinifilaceae;g__ <i>Butyrlicimonas</i>                                          | -1.03 | 0.36  | 1.06.E-02 | -0.63 | 0.53 | 1.19.E-01 |
| Genus  | d__Bacteria;p__Firmicutes;c__Clostridia;o__Peptostreptococcales;Tissierellales;f__Anaerovoracaceae;g__ <i>Family_XIII_UCG_001</i>                | -0.83 | 0.44  | 1.51.E-02 | -0.86 | 0.42 | 1.15.E-02 |
| Genus  | d__Bacteria;p__Bacteroidota;c__Bacteroidia;o__Bacteroidales;f__Prevotellaceae;g__ <i>Prevotella</i>                                              | -1.60 | 0.20  | 1.38.E-02 | -0.59 | 0.55 | 3.60.E-01 |
| Genus  | d__Bacteria;p__Firmicutes;c__Clostridia;o__Oscillospirales;f__Oscillospiraceae;g__ <i>Oscillibacter</i>                                          | -0.99 | 0.37  | 1.38.E-02 | -0.64 | 0.53 | 1.19.E-01 |
| Genus  | d__Bacteria;p__Firmicutes;c__Clostridia;o__Lachnospirales;f__Lachnospiraceae;g__ <i>Eubacterium_eligens_group</i>                                | -0.96 | 0.38  | 1.68.E-02 | -0.56 | 0.57 | 1.53.E-01 |
| Genus  | d__Bacteria;p__Firmicutes;c__Clostridia;o__Lachnospirales;f__Lachnospiraceae;g__ <i>Coproccoccus</i>                                             | -0.94 | 0.39  | 1.71.E-02 | -0.89 | 0.41 | 2.48.E-02 |
| Genus  | d__Bacteria;p__Firmicutes;c__Clostridia;o__Oscillospirales;f__Oscillospiraceae;g__ <i>UCG_005</i>                                                | -0.87 | 0.42  | 2.30.E-02 | -0.73 | 0.48 | 5.81.E-02 |
| Genus  | d__Bacteria;p__Firmicutes;c__Clostridia;o__Oscillospirales;f__Ruminococcaceae;g__uncultured                                                      | -0.77 | 0.46  | 2.78.E-02 | -0.17 | 0.84 | 6.28.E-01 |
| Genus  | d__Bacteria;p__Firmicutes;c__Clostridia;o__Christensenellales;f__Christensenellaceae;g__ <i>Christensenellaceae_R7_group</i>                     | -1.01 | 0.36  | 3.87.E-02 | -0.74 | 0.47 | 1.25.E-01 |
| Genus  | d__Bacteria;p__Bacteroidota;c__Bacteroidia;o__Bacteroidales;f__Barnesiellaceae;g__ <i>Barnesiella</i>                                            | -1.11 | 0.33  | 4.34.E-02 | -0.99 | 0.37 | 7.55.E-02 |
| Genus  | d__Bacteria;p__Firmicutes;c__Clostridia;o__Oscillospirales;f__Eubacterium_coprostanoligenes_group;g__ <i>Eubacterium_coprostanoligenes_group</i> | -0.77 | 0.46  | 4.48.E-02 | -0.34 | 0.71 | 3.67.E-01 |
| Phylum | d__Bacteria;p__Actinobacteriota                                                                                                                  | 1.43  | 4.19  | 4.36.E-06 | 0.87  | 2.39 | 3.94.E-03 |
| Phylum | d__Bacteria;p__Proteobacteria                                                                                                                    | 0.76  | 2.14  | 7.54.E-03 | 0.87  | 2.39 | 3.39.E-03 |
| Class  | d__Bacteria;p__Actinobacteriota;c__Coriobacteriia                                                                                                | 1.96  | 7.12  | 6.22.E-13 | 1.54  | 4.68 | 6.31.E-10 |
| Class  | d__Bacteria;p__Firmicutes;c__Bacilli                                                                                                             | 1.12  | 3.06  | 3.68.E-06 | 0.78  | 2.18 | 7.82.E-04 |
| Class  | d__Bacteria;p__Proteobacteria;c__Gammaproteobacteria                                                                                             | 0.76  | 2.14  | 5.66.E-03 | 0.87  | 2.39 | 1.71.E-03 |
| Order  | d__Bacteria;p__Actinobacteriota;c__Coriobacteriia;o__Coriobacteriales                                                                            | 1.96  | 7.12  | 1.38.E-12 | 1.54  | 4.68 | 1.40.E-09 |
| Order  | d__Bacteria;p__Firmicutes;c__Bacilli;o__Lactobacillales                                                                                          | 2.12  | 8.36  | 7.20.E-09 | 1.63  | 5.13 | 3.72.E-06 |
| Order  | d__Bacteria;p__Firmicutes;c__Clostridia;o__Peptostreptococcales;Tissierellales                                                                   | 0.94  | 2.56  | 7.73.E-05 | 0.32  | 1.38 | 1.86.E-01 |
| Order  | d__Bacteria;p__Actinobacteriota;c__Actinobacteria;o__Bifidobacteriales                                                                           | 1.26  | 3.52  | 1.89.E-03 | 0.56  | 1.76 | 1.71.E-01 |
| Order  | d__Bacteria;p__Proteobacteria;c__Gammaproteobacteria;o__Enterobacterales                                                                         | 1.17  | 3.22  | 2.98.E-03 | 0.83  | 2.28 | 3.81.E-02 |
| Order  | d__Bacteria;p__Firmicutes;c__Clostridia;o__Clostridiales                                                                                         | 1.14  | 3.14  | 2.01.E-02 | 0.46  | 1.58 | 3.48.E-01 |
| Family | d__Bacteria;p__Actinobacteriota;c__Coriobacteriia;o__Coriobacteriales;f__Coriobacteriaceae                                                       | 2.40  | 11.07 | 1.16.E-13 | 1.83  | 6.24 | 8.59.E-10 |

|        |                                                                                                                            |      |       |           |      |      |           |
|--------|----------------------------------------------------------------------------------------------------------------------------|------|-------|-----------|------|------|-----------|
| Family | d__Bacteria;p__Firmicutes;c__Bacilli;o__Lactobacillales;f__Enterococcaceae                                                 | 2.27 | 9.72  | 6.37.E-08 | 1.66 | 5.25 | 2.62.E-05 |
| Family | d__Bacteria;p__Firmicutes;c__Bacilli;o__Lactobacillales;f__Lactobacillaceae                                                | 2.24 | 9.39  | 7.22.E-07 | 1.70 | 5.47 | 7.94.E-05 |
| Family | d__Bacteria;p__Actinobacteriota;c__Coriobacteriia;o__Coriobacteriales;f__Eggerthellaceae                                   | 1.16 | 3.20  | 2.12.E-06 | 0.86 | 2.37 | 2.24.E-04 |
| Family | d__Bacteria;p__Firmicutes;c__Bacilli;o__Lactobacillales;f__Streptococcaceae                                                | 1.22 | 3.39  | 2.62.E-05 | 0.73 | 2.09 | 9.83.E-03 |
| Family | d__Bacteria;p__Firmicutes;c__Clostridia;o__Peptostreptococcales;Tissierellales;f__Peptostreptococcaceae                    | 1.32 | 3.73  | 9.44.E-05 | 0.64 | 1.90 | 6.12.E-02 |
| Family | d__Bacteria;p__Actinobacteriota;c__Actinobacteria;o__Bifidobacteriales;f__Bifidobacteriaceae                               | 1.26 | 3.52  | 1.66.E-03 | 0.56 | 1.76 | 1.58.E-01 |
| Family | d__Bacteria;p__Proteobacteria;c__Gammaproteobacteria;o__Enterobacterales;f__Enterobacteriaceae                             | 1.17 | 3.22  | 2.55.E-03 | 0.79 | 2.20 | 4.58.E-02 |
| Family | d__Bacteria;p__Firmicutes;c__Clostridia;o__Clostridiales;f__Clostridiaceae                                                 | 1.14 | 3.14  | 1.86.E-02 | 0.46 | 1.58 | 3.52.E-01 |
| Genus  | d__Bacteria;p__Actinobacteriota;c__Coriobacteriia;o__Coriobacteriales;f__Coriobacteriaceae;g__Collinsella                  | 2.40 | 11.07 | 2.86.E-13 | 1.83 | 6.24 | 2.11.E-09 |
| Genus  | d__Bacteria;p__Firmicutes;c__Bacilli;o__Lactobacillales;f__Enterococcaceae;g__Enterococcus                                 | 2.27 | 9.72  | 1.57.E-07 | 1.66 | 5.25 | 5.17.E-05 |
| Genus  | d__Bacteria;p__Firmicutes;c__Bacilli;o__Lactobacillales;f__Lactobacillaceae;g__Lactobacillus                               | 2.19 | 8.94  | 2.88.E-06 | 1.43 | 4.18 | 1.25.E-03 |
| Genus  | d__Bacteria;p__Firmicutes;c__Bacilli;o__Lactobacillales;f__Streptococcaceae;g__Streptococcus                               | 1.25 | 3.49  | 4.28.E-05 | 0.76 | 2.14 | 9.01.E-03 |
| Genus  | d__Bacteria;p__Firmicutes;c__Bacilli;o__Erysipelotrichales;f__Erysipelotrichaceae;g__Turicibacter                          | 1.45 | 4.26  | 4.63.E-05 | 0.64 | 1.89 | 6.61.E-02 |
| Genus  | d__Bacteria;p__Firmicutes;c__Clostridia;o__Peptostreptococcales;Tissierellales;f__Peptostreptococcaceae;g__Romboutsia      | 1.44 | 4.22  | 4.63.E-05 | 0.70 | 2.02 | 3.87.E-02 |
| Genus  | d__Bacteria;p__Firmicutes;c__Clostridia;o__Oscillospirales;f__Ruminococcaceae;g__UBA1819                                   | 0.56 | 1.74  | 1.07.E-01 | 1.44 | 4.22 | 4.67.E-05 |
| Genus  | d__Bacteria;p__Firmicutes;c__Bacilli;o__Lactobacillales;f__Lactobacillaceae;g__Pediococcus                                 | 0.90 | 2.47  | 8.02.E-03 | 1.28 | 3.61 | 2.29.E-04 |
| Genus  | d__Bacteria;p__Firmicutes;c__Clostridia;o__Lachnospirales;f__Lachnospiraceae;g__Blautia                                    | 0.90 | 2.45  | 2.86.E-04 | 0.24 | 1.27 | 3.21.E-01 |
| Genus  | d__Bacteria;p__Firmicutes;c__Clostridia;o__Lachnospirales;f__Lachnospiraceae;g__Eubacterium_hallii_group                   | 1.28 | 3.59  | 8.84.E-04 | 0.69 | 1.99 | 7.18.E-02 |
| Genus  | d__Bacteria;p__Proteobacteria;c__Gammaproteobacteria;o__Enterobacterales;f__Enterobacteriaceae;g__Escherichia/Shigella     | 1.41 | 4.10  | 9.73.E-04 | 0.61 | 1.84 | 1.39.E-01 |
| Genus  | d__Bacteria;p__Actinobacteriota;c__Actinobacteria;o__Bifidobacteriales;f__Bifidobacteriaceae;g__Bifidobacterium            | 1.26 | 3.52  | 2.77.E-03 | 0.56 | 1.76 | 1.59.E-01 |
| Genus  | d__Bacteria;p__Proteobacteria;c__Gammaproteobacteria;o__Enterobacterales;f__Enterobacteriaceae;g__Citrobacter              | 0.42 | 1.52  | 3.21.E-01 | 1.11 | 3.03 | 1.02.E-02 |
| Genus  | d__Bacteria;p__Firmicutes;c__Clostridia;o__Clostridiales;f__Clostridiaceae;g__Clostridium_sensu_stricto_1                  | 1.14 | 3.14  | 1.99.E-02 | 0.32 | 1.38 | 5.16.E-01 |
| Genus  | d__Bacteria;p__Firmicutes;c__Clostridia;o__Peptostreptococcales;Tissierellales;f__Peptostreptococcaceae;g__Intestinibacter | 0.57 | 1.76  | 3.39.E-02 | 0.22 | 1.24 | 4.14.E-01 |



|       |                                                                                                                              |      |      |           |      |      |           |
|-------|------------------------------------------------------------------------------------------------------------------------------|------|------|-----------|------|------|-----------|
| Genus | d_Bacteria;p_Firmicutes;c_Clostridia;o_Peptostreptococcales;Tissierellales;f_Anaerovoracaceae;g_Family_XIII_AD30<br>II_group | 0.94 | 2.55 | 3.43.E-02 | 0.67 | 1.96 | 1.23.E-01 |
|-------|------------------------------------------------------------------------------------------------------------------------------|------|------|-----------|------|------|-----------|

<sup>a</sup> Compared with healthy controls, less abundant taxa and more abundant taxa are shown with blue and red, respectively, in patients with COVID-19.

<sup>b</sup> Healthy controls were used as a baseline

<sup>c</sup> The coefficients were exponentiated because the relative abundance of taxa was log-transformed in the mixed model.

<sup>d</sup> The *q*-values representing less than 0.05 in RP or RN are listed.
